# Supplementary material
Source: Springer Nature journal article supplement (https://www.springermedizin.de/resource/supplementary/12885_2009_1743_MOESM4_ESM.pdf/9472818)

## Chang et al. (343)

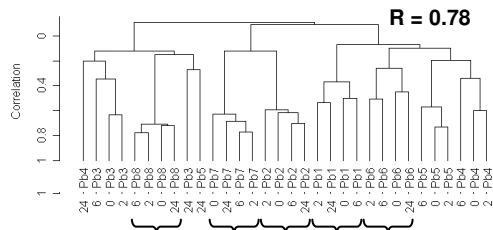

## Sorlie et al. (271)

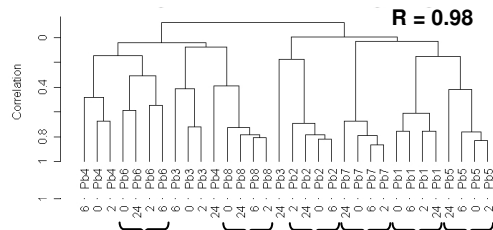

## Wang et al. (27)

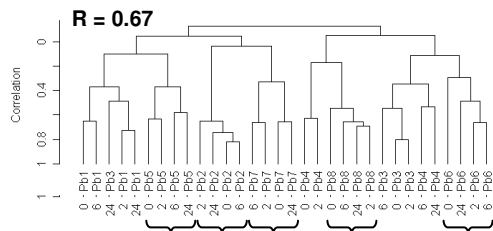

## van't Veer et al. (19)

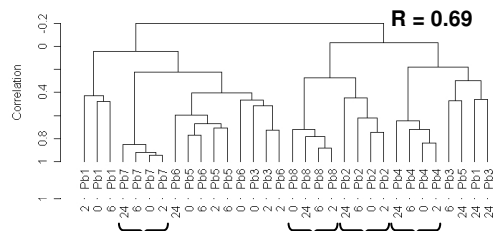

## Ivshina et al. (10)

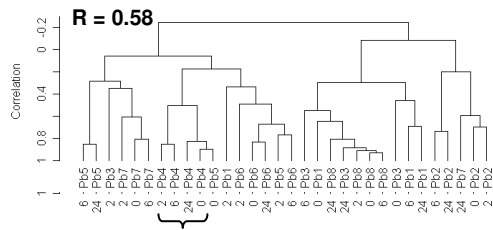

## Paik et al. (8)

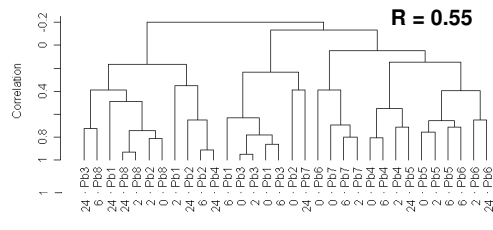

Supplement: MOESM4 [file 9472818]
